# Supplementary material
Source: publisher figshare collection journal article supplement (https://springernature.figshare.com/ndownloader/files/23162891)

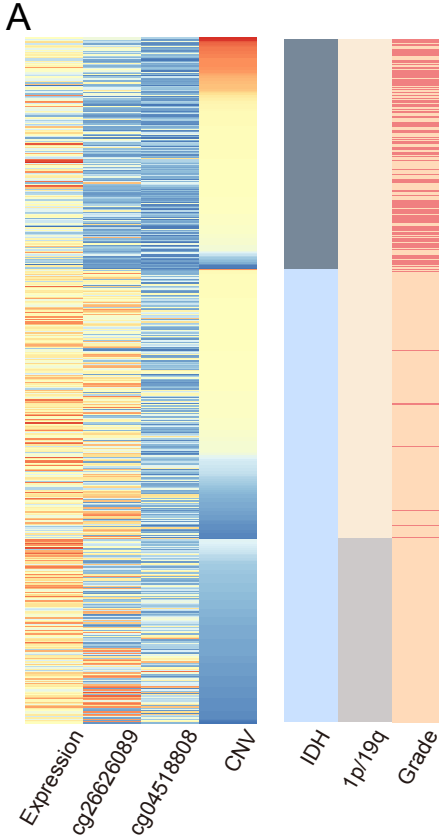

Multi-omics

Expression, methylation and CNV (normalized)

IDH

IDH-mut

IDH-WT

1p/19q

1p/19q non-code

1p/19q code

Grade

GBM

LGG

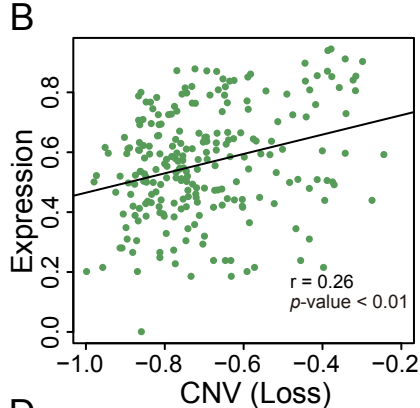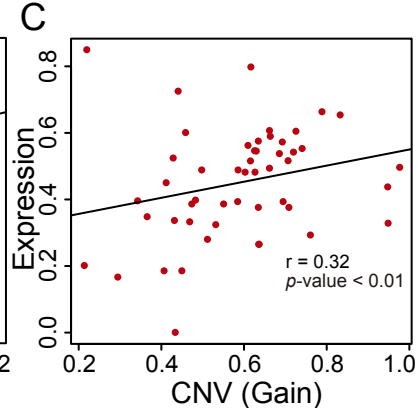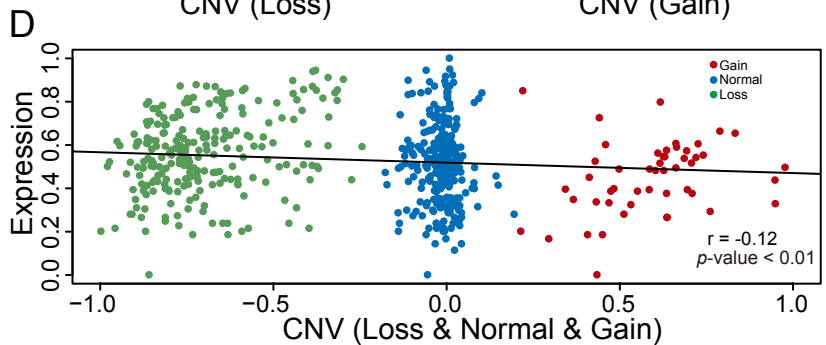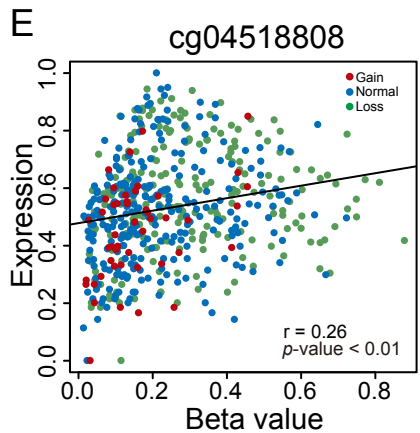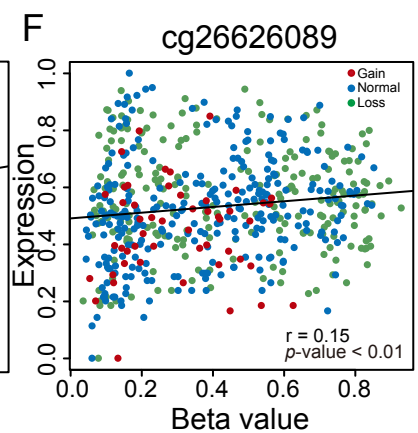

Supplement: Supplementary file [file 23162891]
